# Supplementary material for: Differential Enzymatic Activity of Rat ADAR2 Splicing Variants Is Due to Altered Capability to Interact with RNA in the Deaminase Domain
Source: Genes (Basel). 2018 Feb 8;9(2):79. doi: 10.3390/genes9020079 (PMC5852575; doi:10.3390/genes9020079)
Supplement: Supplementary file 1 [file genes-09-00079-s001.pdf]

## Supplementary results

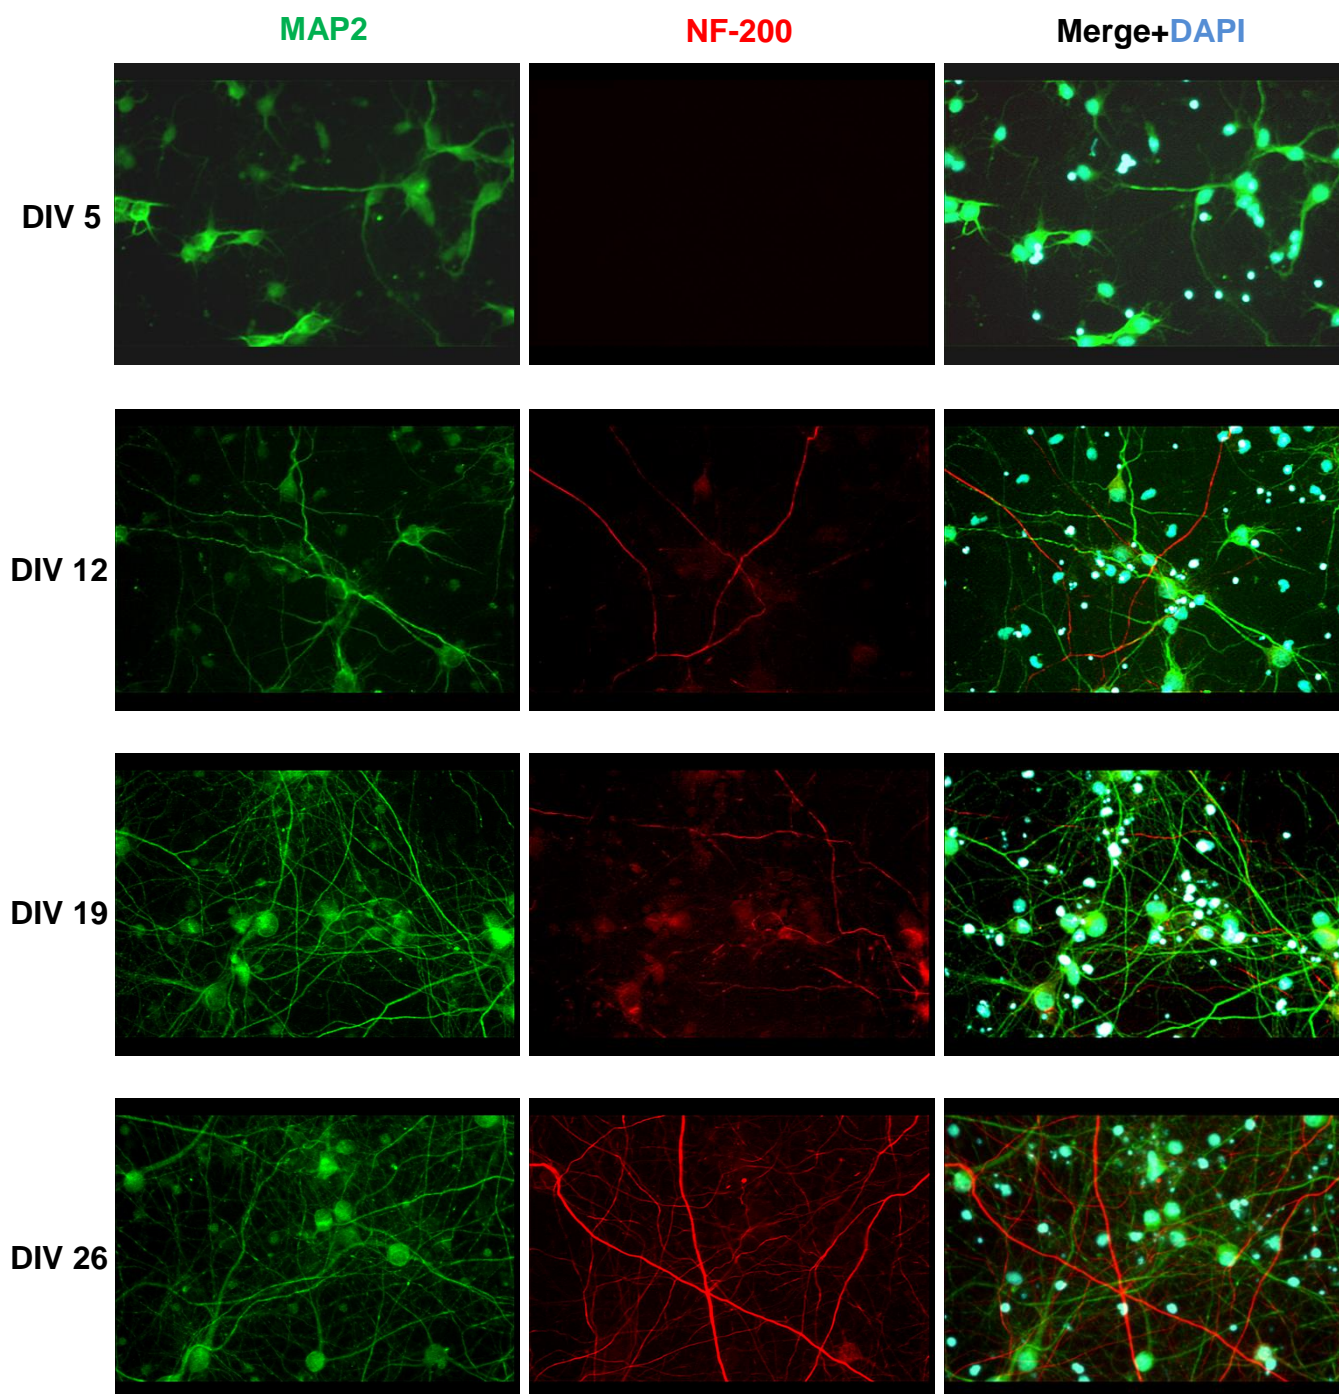

**Figure S1:** Microtubule Associated Protein (MAP2, green) and Neurofilament 200 (NF-200, red) staining in primary cortical neuron culture at DIV 5-12-19-26. In the merged images the DAPI staining showing nuclei. Magnification 200X. **DIV5 to DIV26 panels show the progressive maturation of neurons expressing an increasing amount of MAP2 and NF-200. The extremely branched dendritic tree with well-defined dendrites and axons**

that exhibited immunoreactivity to NF-200 indicated the generation of healthy mature neurons.

**ADAR2 expression during primary cortical neuron cultures maturation**

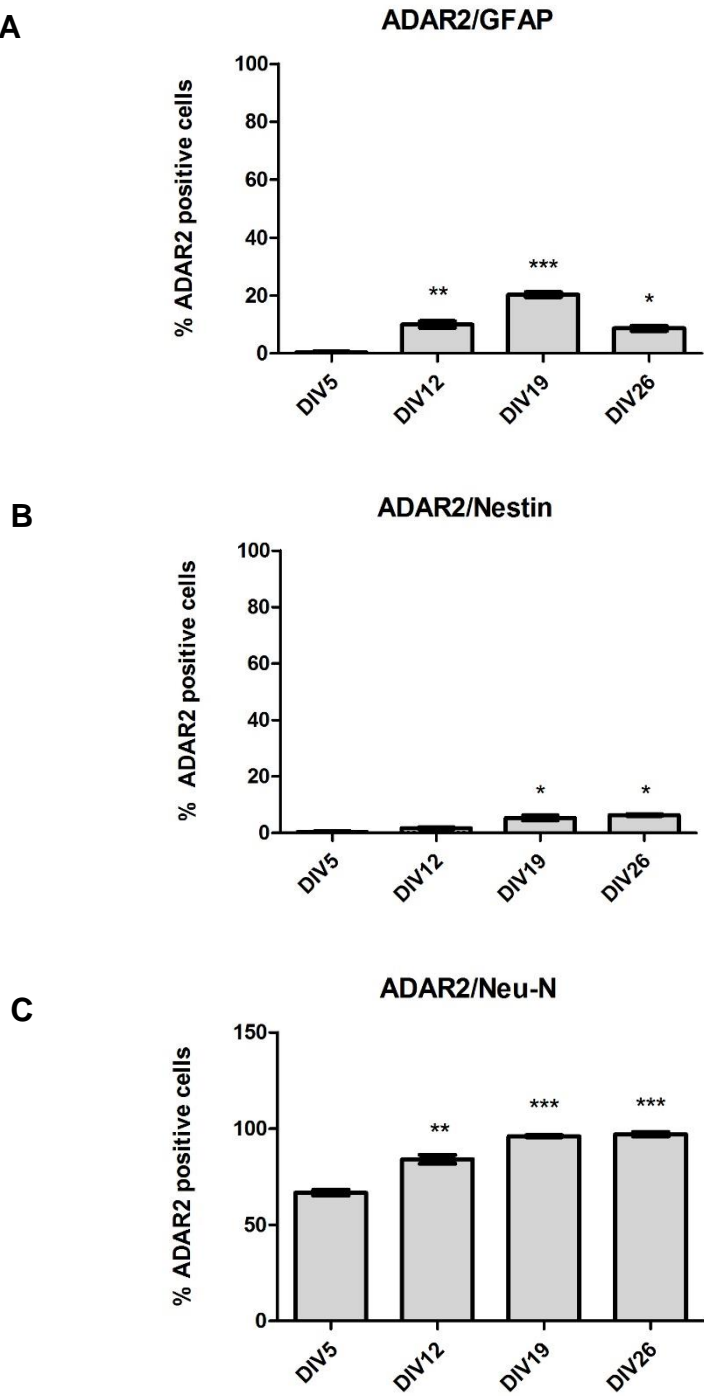

**Figure S2:** Percentage of GFAP (A), Nestin (B) and Neu-N (C) positive cells expressing ADAR2. Data are presented as means  $\pm$  SEM of triplicate experiments. Statistical analysis

was performed using one-way ANOVA followed by Bonferroni post hoc test (\* $p < 0.05$ ; \*\* $p < 0.01$ ; \*\*\* $p < 0.001$ ). **These results showed that ADAR2 is mainly expressed by cortical neurons.**

### Quantification of protein isoforms expression

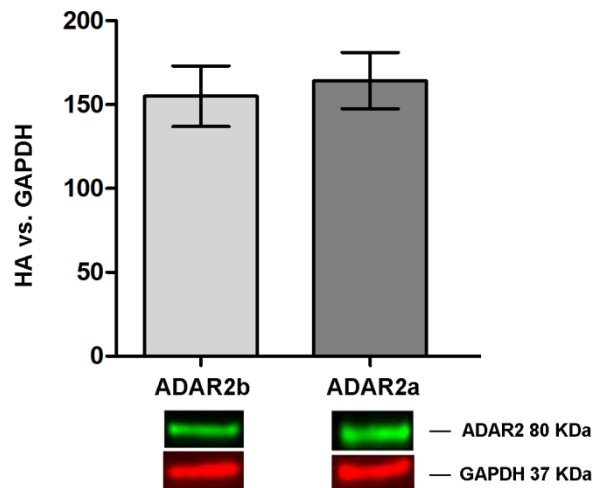

**Figure S3:** Western blot analysis for rADAR2a and rADAR2b expression. Both proteins are detected through the HA tag. The primary antibody rabbit anti-HA (Sigma-Aldrich, cod: H6908) was used 1:1000 in BSA 5% dissolved in TBST 0.2% 1 h at RT after an overnight incubation with blocking solution BSA 5% in TBST 0.2%. Mouse monoclonal anti-GAPDH (1:10'000, Millipore Billerica, MA 01821; cod: MAB374) was incubated on the membrane overnight at 4° C. IR-Dye® secondary antibodies are both incubated 1 h at RT in TBST 0.2%. Signals were detected using an Odyssey infrared imaging system (LI-COR Biosciences) and quantified using Odyssey version 1.1 (LI-COR Biosciences). Data are presented as means  $\pm$  SEM of triplicate experiments. Statistical analysis was performed using unpaired T-Test.

**No statistically significant difference between ADAR2a and ADAR2b expression following lentivirus infection of primary cortical neurons is detected.**

## RNA editing levels in PC12 cells overexpressing ADAR2 isoforms

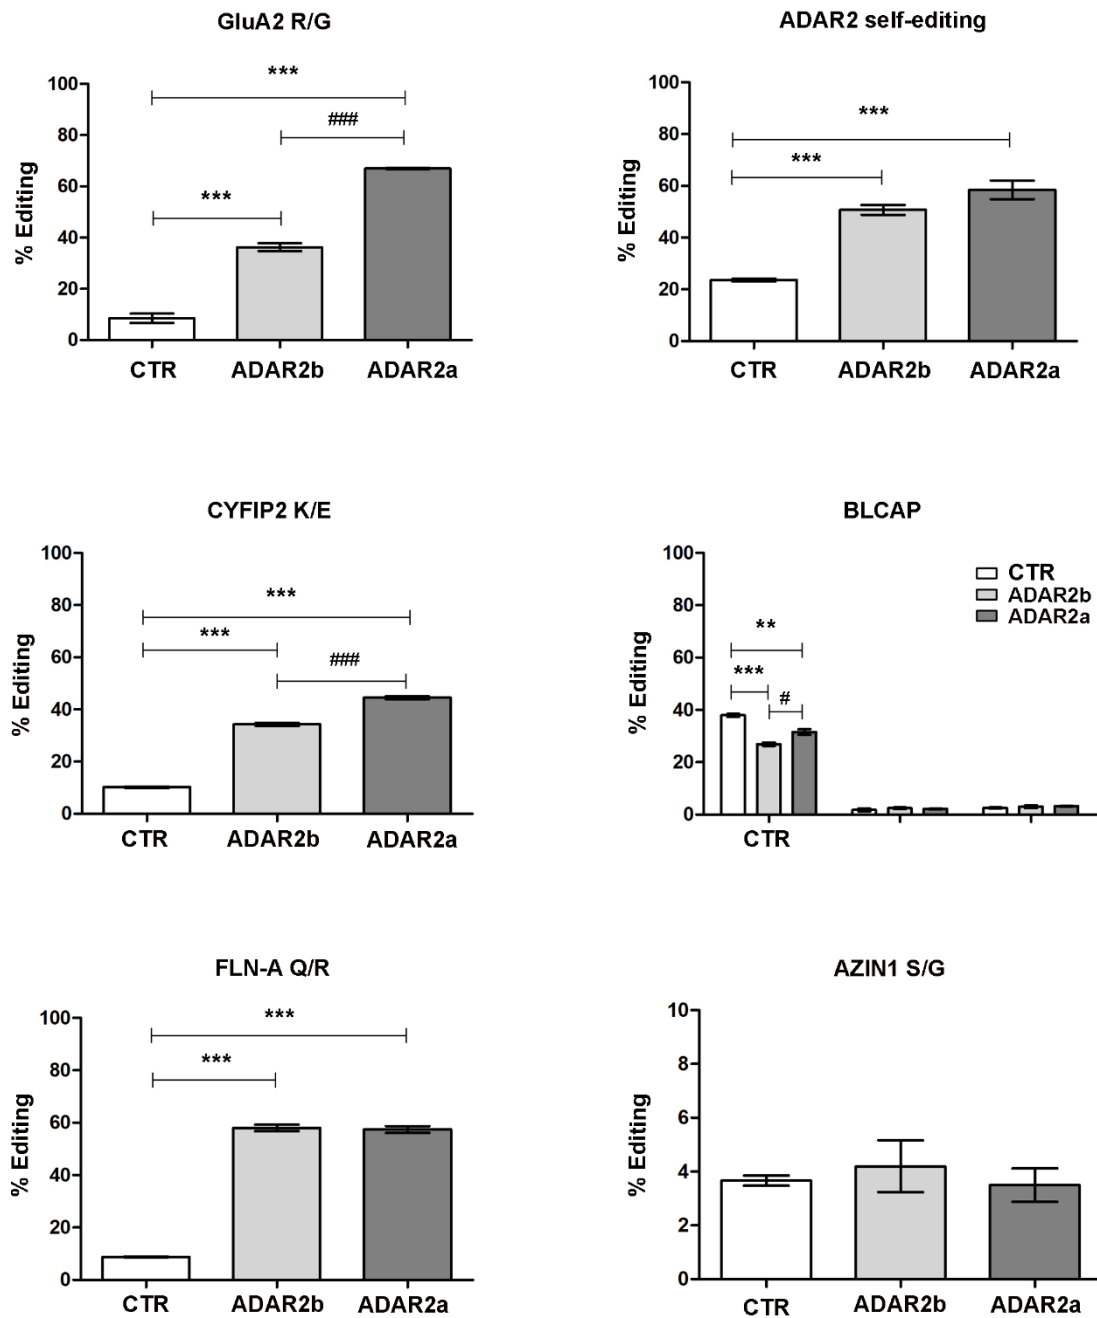

**Figure S4:** RNA editing levels in PC12 transduced with lentiviral particles carrying ADAR2a or ADAR2b splicing isoforms. Data are presented as means  $\pm$  SEM of triplicate experiments. White bar: not transduced cells; grey bar: ADAR2b transduced cells; dark grey bar: ADAR2a transduced cells. Statistical analysis was performed using one-way ANOVA followed by

Bonferroni post hoc test (\* $p < 0.05$ ; \*\* $p < 0.01$ ; \*\*\* $p < 0.001$  vs. CTR; #  $p < 0.05$ ; ##  $p < 0.01$ ; ###  $p < 0.001$  vs. ADAR2b).

**Increased editing activity was observed for ADAR2a compared to ADAR2b on specific editing sites: GluA2 R/G site (ADAR2b:  $36.2 \pm 1.53\%$ ; ADAR2a:  $67 \pm 0.2\%$   $p < 0.001$  vs. ADAR2b), CYFIP2 K/E site (ADAR2b:  $34.3 \pm 0.5\%$ ; ADAR2a:  $44.5 \pm 0.5\%$   $p < 0.001$  vs. ADAR2b).**

**Regarding BLCAP transcript, overexpression of ADAR2 isoforms affected only Y/C site: both ADAR2 decreased the editing level (CTR:  $38 \pm 0.6\%$ ; ADAR2b:  $26.9 \pm 0.63\%$   $p < 0.001$ , ADAR2a:  $31.5 \pm 1.12\%$ ,  $p < 0.01$ ), but ADAR2a had increased activity if compared to ADAR2b (ADAR2b:  $26.9 \pm 0.63\%$ , ADAR2a:  $31.5 \pm 1.12\%$ ,  $p < 0.05$ ).**

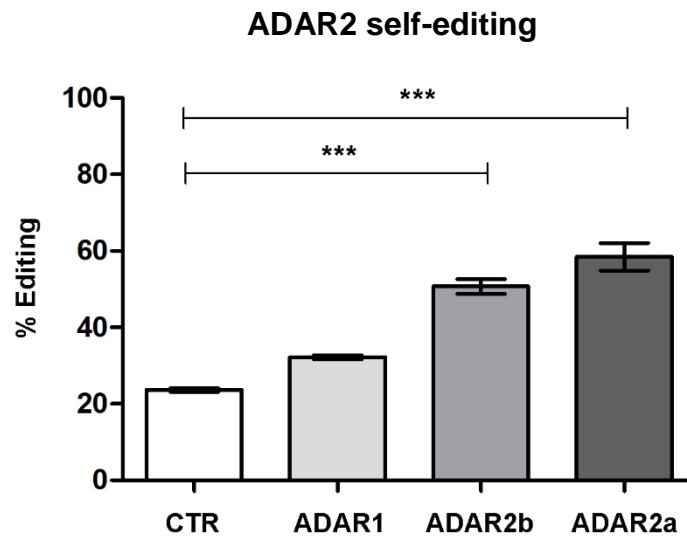

**Figure S5:** ADAR2 self-editing levels in PC12 transduced with lentiviral particles carrying ADAR1, ADAR2a or ADAR2b splicing isoforms. Data are presented as means  $\pm$  SEM of triplicate experiment. White bar: not transduced cells. Statistical analysis was performed using one-way ANOVA followed by Bonferroni post hoc test (\* $p < 0.05$ ; \*\* $p < 0.01$ ; \*\*\* $p < 0.001$  vs. CTR). **No statistically significant increase of ADAR2 self-editing level was observed after ADAR1 lentiviral transduction, meaning that this is an ADAR2 specific editing site.**

**A**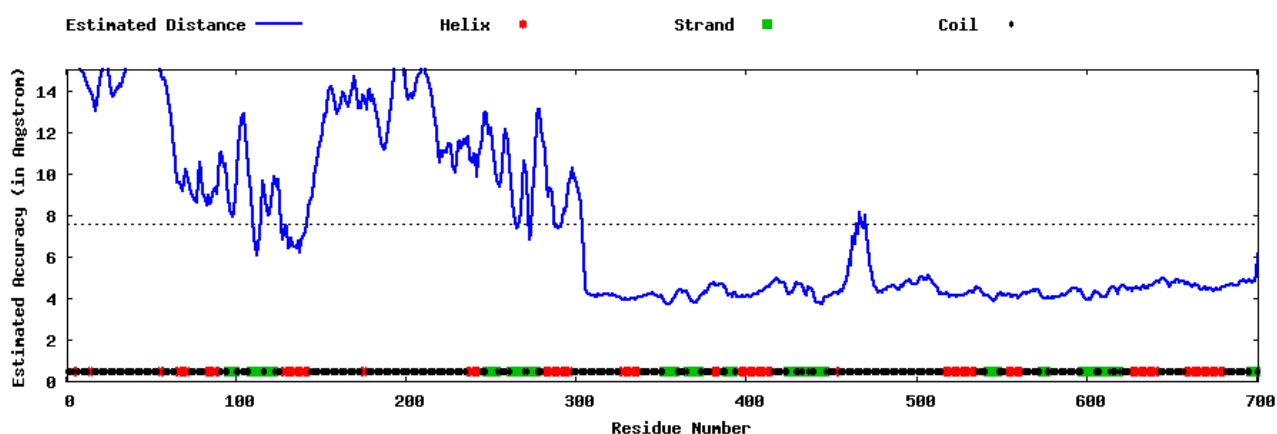**B**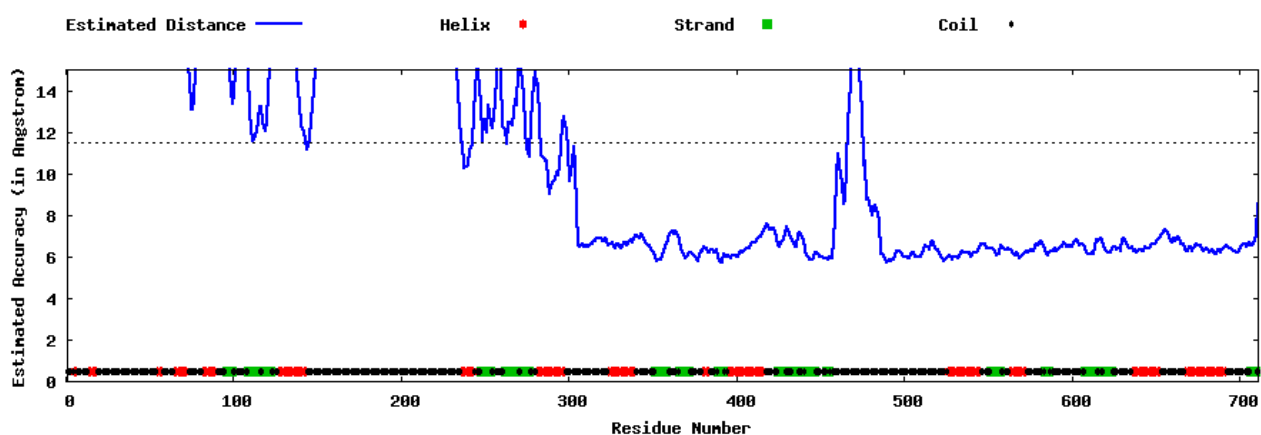

**Figure S6:** Analysis of local structure quality performed by I-Tasser for the predicted structures of the 2 protein isoforms ADAR2a (A) and ADAR 2b (B). Higher values indicates aminoacid with less accurate positioning in the structure model. **As expected, predictions were more reliable in the C-terminal portions from aa 305 that match the deaminase domain represented in the template structure used for modeling. Only these portions were used for molecular dynamics.**

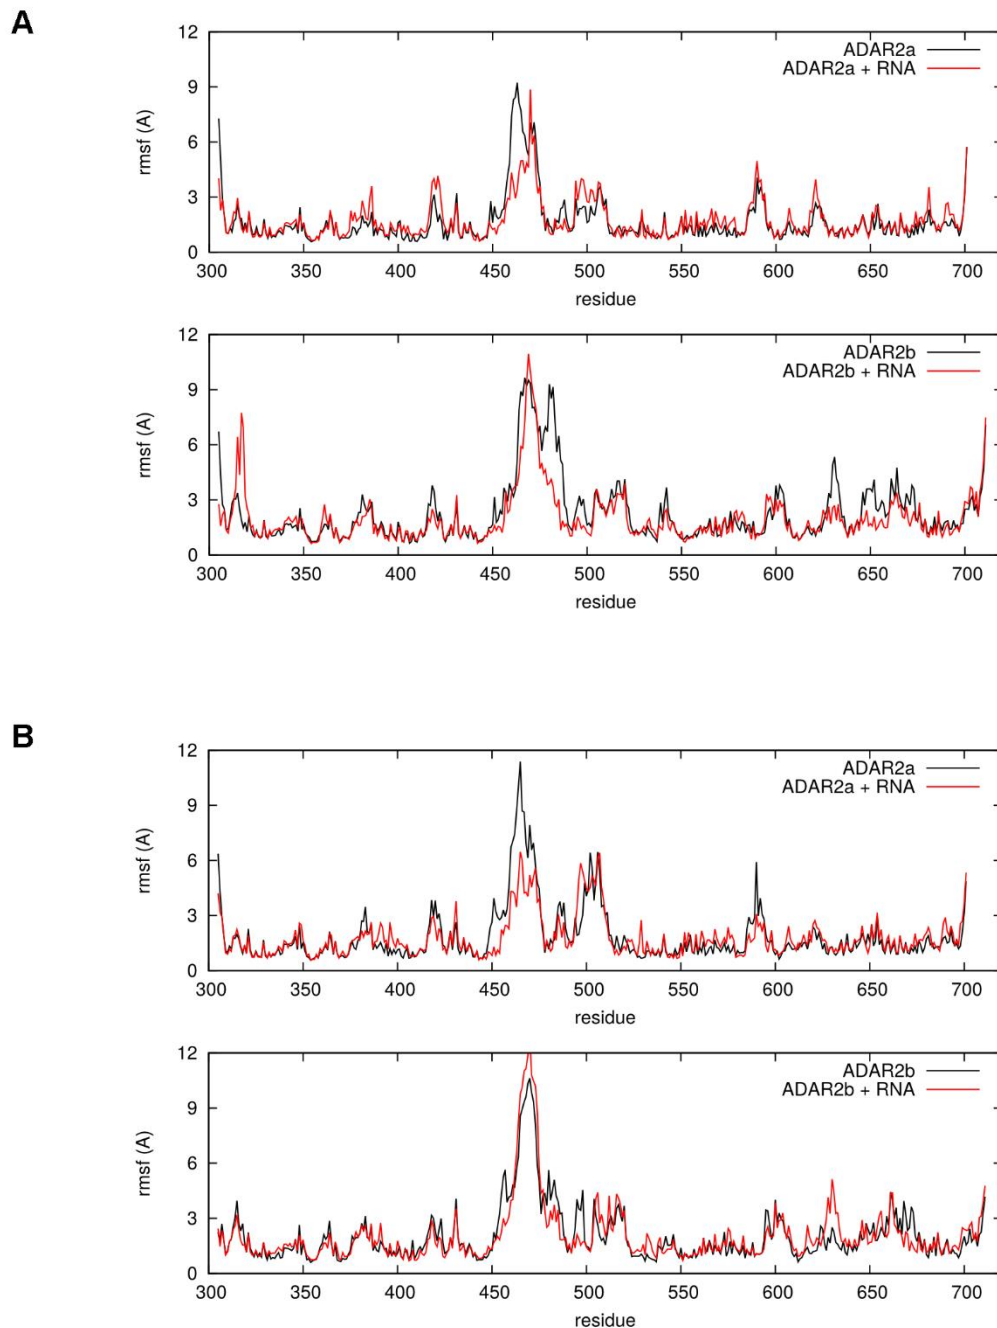

**Figure S7:** (A) Root mean square fluctuation per residue obtained from the MD simulations of ADAR2a and ADAR2b with and without RNA in the absence of the  $\text{Zn}^{++}$  ion; (B) root mean square fluctuation per residue obtained from the MD simulations of ADAR2a and ADAR2b with and without RNA in the presence of the  $\text{Zn}^{++}$  ion.

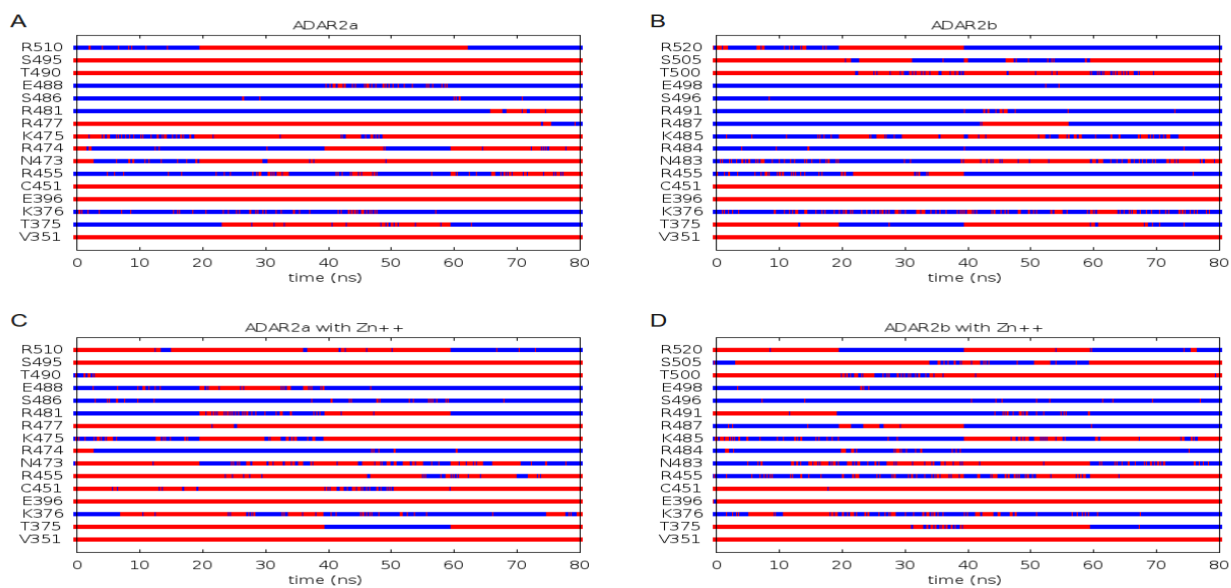

**Figure S8:** Presence of hydrogen bonds (HB) between selected residues and RNA as a function of time. Red color denotes absence of HB, while blue color denotes presence of at least one HB. Panel A: ADAR2a; panel B: ADAR2b; panel C: ADAR2a with Zn<sup>++</sup> ion; panel D: ADAR2b with Zn<sup>++</sup> ion.

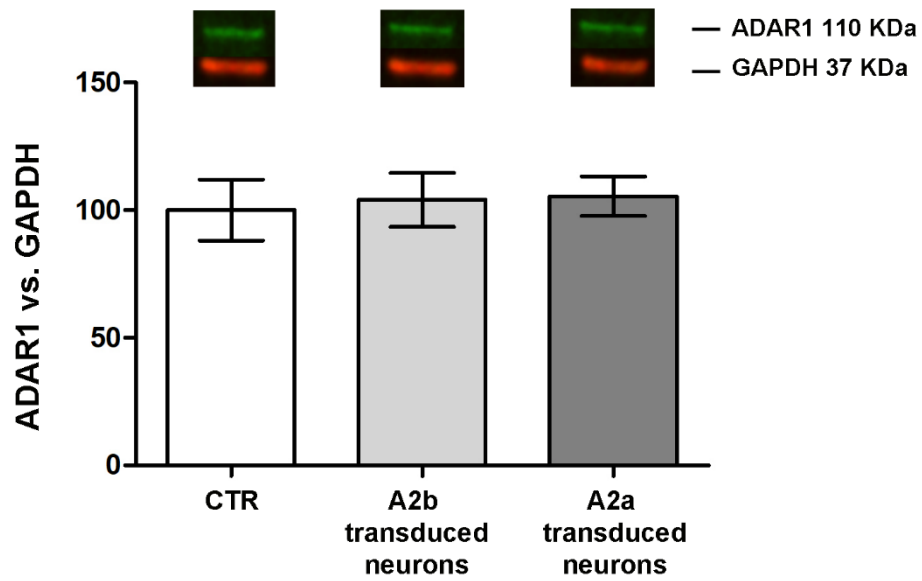

**Figure S9:** ADAR1 endogenous expression after ADAR2a (A2a) and ADAR2b (A2b) overexpression in neuronal cells. White bar: untransduced neurons; grey bar: ADAR2b transduced neurons; dark grey bar: ADAR2a transduced neurons. **No statistical significant variation was observed.**
